# Supplementary figures and images for: Real-time and on-line parallel detection of key fermentation process parameters by near-infrared spectroscopy in different environments
Source: Research Square preprint supplement (doi:10.21203/rs.3.rs-507588/v1), 2021-05-12

**Graphical abstract**


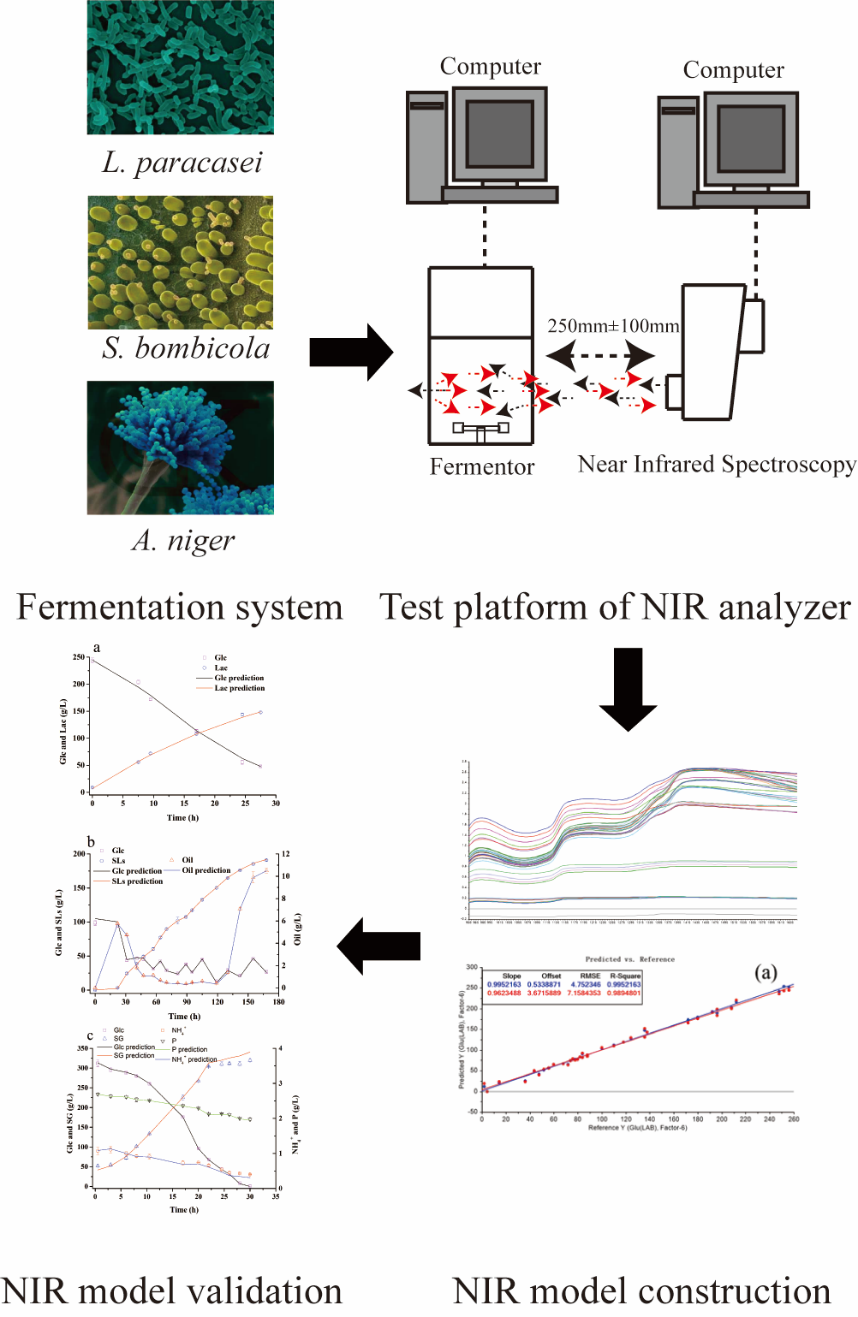

Supplement: Supplementary file 2 [file ac2641f02692cffe198f042a.docx]
